# Supplementary material
Source: ML conference proceedings conference paper supplement (https://openreview.net/forum?id=5t7DtLwTVC)
Supplement: supplementary_material [file attachment]

# Wikipedia Contradiction Annotation Guideline

## Table of Contents

|                                                          |           |
|----------------------------------------------------------|-----------|
| <b>1. Setup the Label Studio environment .....</b>       | <b>2</b>  |
| <b>2. Task annotation .....</b>                          | <b>6</b>  |
| Step1: Check whether the inconsistent tag is valid. .... | 6         |
| Step2: find the inconsistent passages. ....              | 7         |
| Step3: Annotate the contradiction reason. ....           | 8         |
| Step4: Annotate the contradiction types. ....            | 9         |
| Step5: Annotate the question and answers.....            | 14        |
| <b>3. Export annotations .....</b>                       | <b>15</b> |

# 1. Setup the Label Studio environment

- 1) install Label Studio locally

Github: <https://github.com/HumanSignal/label-studio>

Here's the command I used to install it in my laptop (make sure python>=3.8):

```
conda create --name label-studio
conda activate label-studio
conda install psycpg2
pip install label-studio
```

About LS version: I'm using Label Studio 1.8.2. Normally all new versions later than 1.8.2 should work, I recommend using google Chrome to do annotation.

- 2) run "label-studio" to start the server at <http://localhost:8080>
- 3) create an account and log in
- 4) create a new project called "WikipediaContradict" or any other names
- 5)

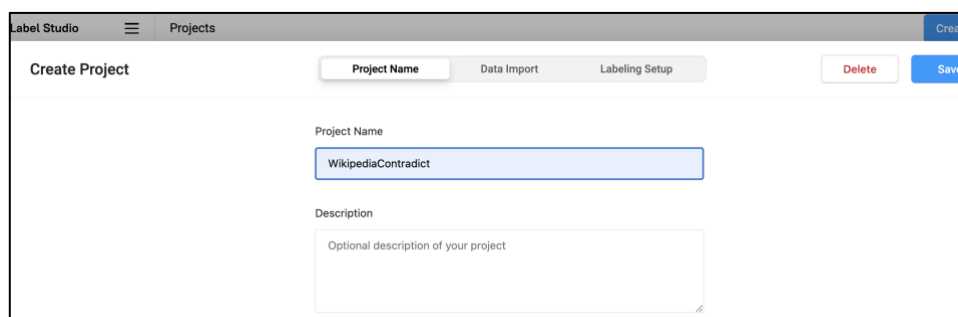

Fig 1: Create a new project

- 6) import the annotation tasks into the platform: first, click "upload files" and choose "inconsistentArticleTags\_all.json"; next, click "save" to finish importing the 170 annotation tasks

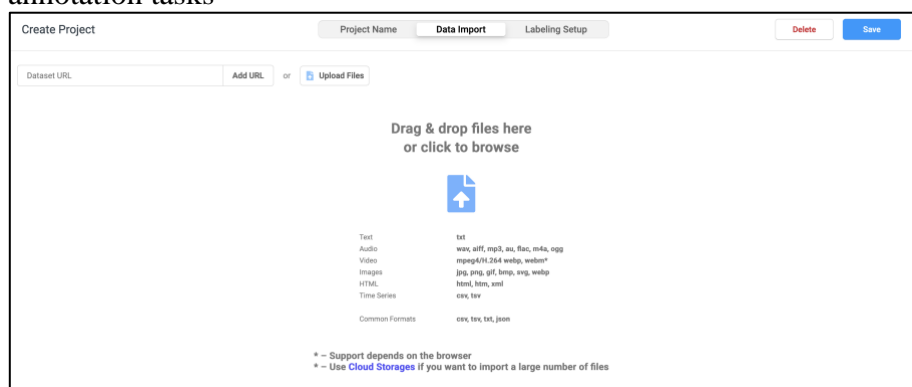

Fig 2: Import annotated data

- 7) setup the annotation UI:
  - a) click "settings" on the upper right corner:

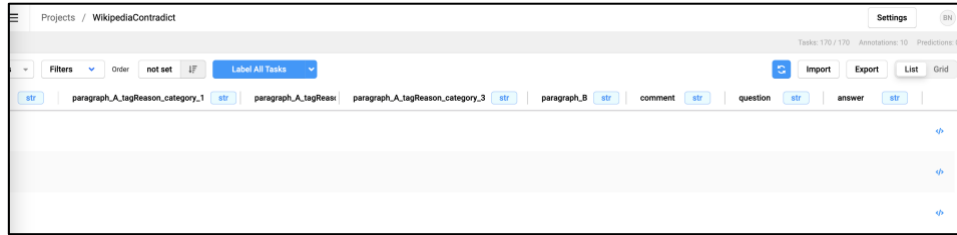

Fig 3: Setup the annotation UI

- b) click “labelling interface”, copy-paste the following UI code into the box (or the code from the “WikipediaContradiction\_LabelStudioUI”), then click “save”. After this, you can start annotating by clicking “Label All Tasks” or any task in the panel.

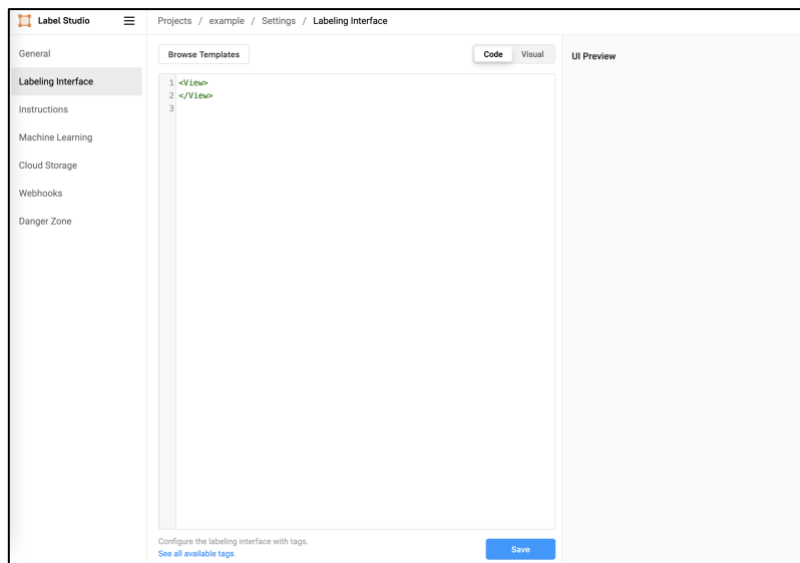

Fig 4: Setup the annotation UI - Continue

```
<View>
<!-- <header name="articletitle" value="Wikipedia article: $title"/> -->
<HyperText clickableLinks="true" name="articlelink" inline="true" target="_blank" value="">
  <h2><a target="_blank" href="$url">Wikipedia article: $title</a></h2>
</HyperText>

<View style="box-shadow: 2px 2px 5px #999; padding: 20px; margin-top: 2em; border-radius: 5px;">
  <Header value="Inconsistence or contradictory tag"/>
  <Text name="wikitag" value="$paragraph_A"/>
</View>

<View style="box-shadow: 2px 2px 5px #999; padding: 20px; margin-top: 2em; border-radius: 5px;">
  <Header value="* Step1: Is this tag valid?" />
  <Choices name="wikitag_label_valid" toName="wikitag" choice="single" showInLine="true">
    <Choice value="Valid"/>
    <Choice value="Invalid"/>
  </Choices>
  <Header value="Additional comment" />
  <TextArea name="valid_comment" toName="wikitag"
    showSubmitButton="true" maxSubmissions="1" editable="true"
    required="false" />
</View>

<View>

<View visibleWhen="choice-selected" whenTagName="wikitag_label_valid" whenChoiceValue="Valid" style="box-shadow: 2px 2px 5px #999; padding: 20px; margin-top: 2em; border-radius: 5px;">
  <Header value="* Step 2: Copy the inconsistent sentences, paragraphs, or information (e.g., table or infobox rows) from the wikipedia article(s) into the following boxes"/>
  <Header value="* Article A title" />
  <TextArea name="paragraphA_article" toName="wikitag"
    showSubmitButton="true" maxSubmissions="1" editable="true"
  </TextArea>
</View>
```

```

        required="true" />

<Header value="* Article A relevant information (Passage 1)" />
  <TextArea name="paragraphA_information" toName="wikitag"
    showSubmitButton="true" maxSubmissions="1" editable="true"
    required="true" />
<Header value="Article A relevant information_stand-alone (Passage 1)" />
  <TextArea name="paragraphA_information_standalone" toName="wikitag"
    showSubmitButton="true" maxSubmissions="1" editable="true"
    required="false" />

<Header value="* Article B title" />

  <TextArea name="paragraphB_article" toName="wikitag"
    showSubmitButton="true" maxSubmissions="1" editable="true"
    required="true" />

<Header value="* Article B relevant information (Passage 2)" />
  <TextArea name="paragraphB_information" toName="wikitag"
    showSubmitButton="true" maxSubmissions="1" editable="true"
    required="true" />
<Header value="Article B relevant information_stand-alone (Passage 2)" />
  <TextArea name="paragraphB_information_standalone" toName="wikitag"
    showSubmitButton="true" maxSubmissions="1" editable="true"
    required="false" />

</View>

<View visibleWhen="choice-selected" whenTagName="wikitag_label_valid" whenChoiceValue="Valid" style="box-shadow: 2px
2px 5px #999; padding: 20px; margin-top: 2em; border-radius: 5px;">
  <Header value="* Step 3: Contradiction reason" />
  <Header size = "8">* Passage 1 states that: </Header> <TextArea name="relevantInfo_comment_A" toName="wikitag"
    showSubmitButton="true" maxSubmissions="1" editable="true"
    required="true" />
  <Header size = "8">* However, passage 2 states that: </Header> <TextArea name="relevantInfo_comment_B"
toName="wikitag"
    showSubmitButton="true" maxSubmissions="1" editable="true"
    required="true" />
  <Header size = "8">If possible, copy the contradicted span from passage 1: </Header> <TextArea
name="relevantInfo_comment_A_Span" toName="wikitag"
    showSubmitButton="true" maxSubmissions="1" editable="true"
    required="false" />
  <Header size = "8">If possible, copy the contradicted span from passage 2: </Header> <TextArea
name="relevantInfo_comment_B_Span" toName="wikitag"
    showSubmitButton="true" maxSubmissions="1" editable="true"
    required="false" />

</View>

<style>
.center-text {
  text-align: center;
}
</style>

<View visibleWhen="choice-selected" whenTagName="wikitag_label_valid" whenChoiceValue="Valid" style="box-shadow: 2px
2px 5px #999; padding: 20px; margin-top: 2em; border-radius: 5px;">
  <Header value="* Step 4: Choose all options that can describe the above contradictory information"/>
  <Taxonomy name="taxonomy" toName="wikitag">
    <Choice value="Contradict type I">
      <Choice value="(PhraseLevel) Entity - Date/time" />
      <Choice value="(PhraseLevel) Entity - Location/GPE (Non-GPE locations, mountain ranges, bodies of water, and Countries,
cities, states)" />
      <Choice value="(PhraseLevel) Entity - Number" />
      <Choice value="(PhraseLevel) Entity - Organization (Companies, agencies, institutions, etc.)" />
      <Choice value="(PhraseLevel) Entity - Person" />
      <Choice value="(PhraseLevel) Entity - NORP (Nationalities or religious or political groups)" />
      <Choice value="(PhraseLevel) Entity - FAC (Buildings, airports, highways, bridges, etc.)" />
      <Choice value="(PhraseLevel) Entity - Work-of-Art (Titles of books, songs, etc.)" />
      <Choice value="(PhraseLevel) Entity - Product (Titles of books, songs, etc.)" />
      <Choice value="(PhraseLevel) Entity - Law (Named documents made into laws)" />
      <Choice value="(PhraseLevel) Entity - Language (Any named language)" />
      <Choice value="(PhraseLevel) Entity - Event (Named hurricanes, battles, wars, sports events, etc.)" />
      <Choice value="(PhraseLevel) Entity - Other" />
      <Choice value="(PhraseLevel) NP-related (non-entity)" />
      <Choice value="(PhraseLevel) Event/Relation (e.g., verb)" />
      <Choice value="(DiscourseLevel) NP-related " />

```

```

    <Choice value="(DiscourseLevel) Event/Relation-related " />
  </Choice>
  <Choice value="Contradict type II">
    <Choice value="Text - Text" />
    <Choice value="Text - Infobox/table" />
    <Choice value="Infobox/table - Infobox/table" />
    <Choice value="Other" />
  </Choice>
  <Choice value="Contradict type III">
    <Choice value="Within the same article" />
    <Choice value="Across different articles" />
  </Choice>
  <Choice value="Contradict type IV">
    <Choice value="Explicit" />
    <Choice value="Implicit (reasoning required)" />
  </Choice>
</Taxonomy>
<Header value="Additional comment" />
  <TextArea name="contradict_comment" toName="wikitag"
    showSubmitButton="true" maxSubmissions="1" editable="true"
    required="false" />

</View>

<View visibleWhen="choice-selected" whenTagName="wikitag_label_valid" whenChoiceValue="Valid" style="box-shadow: 2px
2px 5px #999; padding: 20px; margin-top: 2em; border-radius: 5px; ">
  <Header value="Step 5: Write at least one question that highlights the contradictions between Passage 1 and Passage 2, eliciting
  different responses based on each passage."/>
  <Header value="* Question 1" />
    <TextArea name="question1" toName="wikitag"
      showSubmitButton="true" maxSubmissions="1" editable="true"
      required="true" />
  <Header value="* Answers for Question 1" />
    <TextArea name="question1_answer1" toName="wikitag"
      showSubmitButton="true" maxSubmissions="1" editable="true"
      required="true" />
    <TextArea name="question1_answer2" toName="wikitag"
      showSubmitButton="true" maxSubmissions="1" editable="true"
      required="true" />

  <Header value="Question 2" />
    <TextArea name="question2" toName="wikitag"
      showSubmitButton="true" maxSubmissions="1" editable="true"
      required="false" />
  <Header value="Answers for Question 2" />
    <TextArea name="question2_answer1" toName="wikitag"
      showSubmitButton="true" maxSubmissions="1" editable="true"
      required="false" />
    <TextArea name="question2_answer2" toName="wikitag"
      showSubmitButton="true" maxSubmissions="1" editable="true"
      required="false" />

  <Header value="Additional comment" />
    <TextArea name="qa_comment" toName="wikitag"
      showSubmitButton="true" maxSubmissions="1" editable="true"
      required="false" />

</View>

</View>

```

Another way is to choose the assigned tasks (e.g., 31 - 40) and click “Label 10 Tasks”, this will open the annotation window for these 10 tasks.

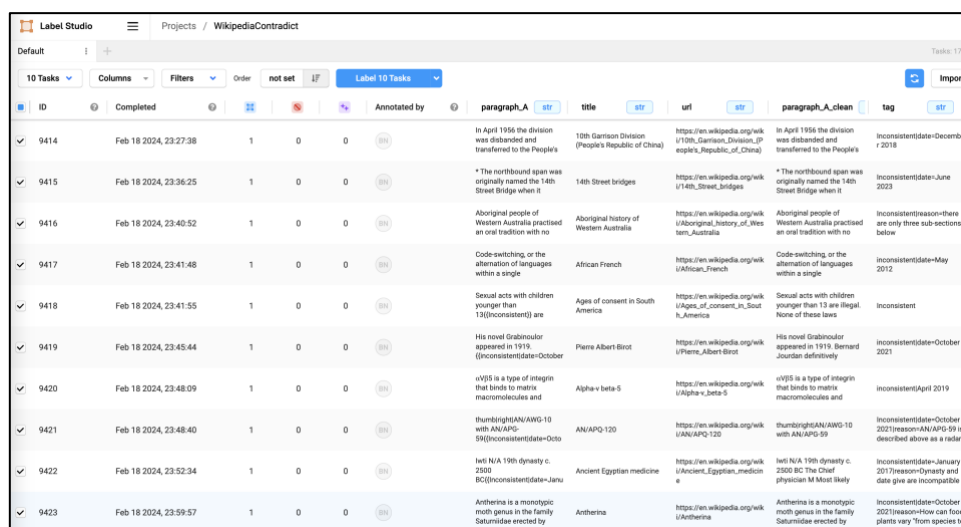

| ID   | Completed             | paragraph_A | title | url | paragraph_A_clean                                                          | tag                                                                        |
|------|-----------------------|-------------|-------|-----|----------------------------------------------------------------------------|----------------------------------------------------------------------------|
| 9414 | Feb 18 2024, 23:27:38 | 1           | 0     | 0   | In April 1956 the division was disbanded and transferred to the People's   | In April 1956 the division was disbanded and transferred to the People's   |
| 9415 | Feb 18 2024, 23:36:25 | 1           | 0     | 0   | * The northbound span was originally named the 14th Street Bridge when it  | * The northbound span was originally named the 14th Street Bridge when it  |
| 9416 | Feb 18 2024, 23:40:52 | 1           | 0     | 0   | Aboriginal people of Western Australia practised an oral tradition with no | Aboriginal people of Western Australia practised an oral tradition with no |
| 9417 | Feb 18 2024, 23:41:48 | 1           | 0     | 0   | Code-switching, or the alternation of languages within a single            | Code-switching, or the alternation of languages within a single            |
| 9418 | Feb 18 2024, 23:41:55 | 1           | 0     | 0   | Sexual acts with children younger than 13 (Inconsistent)                   | Sexual acts with children younger than 13 are illegal                      |
| 9419 | Feb 18 2024, 23:45:44 | 1           | 0     | 0   | His novel Gabañoul appeared in 1919. (Inconsistent)                        | His novel Gabañoul appeared in 1919. Bernard Jourdan definitively          |
| 9420 | Feb 18 2024, 23:48:09 | 1           | 0     | 0   | vJBS is a type of integrin that binds to matrix macromolecules and         | vJBS is a type of integrin that binds to matrix macromolecules and         |
| 9421 | Feb 18 2024, 23:48:40 | 1           | 0     | 0   | thumbingIAN/AWG-10 with AN/APQ-59 (Inconsistent)                           | thumbingIAN/AWG-10 with AN/APQ-59                                          |
| 9422 | Feb 18 2024, 23:52:34 | 1           | 0     | 0   | Iwri N/A 19th dynasty c. 2500 BC (Inconsistent)                            | Iwri N/A 19th dynasty c. 2500 BC The Chief physician M Most likely         |
| 9423 | Feb 18 2024, 23:59:57 | 1           | 0     | 0   | Antherina is a monotypic moth genus in the family Saturniidae erected by   | Antherina is a monotypic moth genus in the family Saturniidae erected by   |

Fig 5: Choosing the annotation tasks

## 2. Task annotation

**Step1: Check whether the inconsistent tag is valid.**

1) Open the Wikipedia article by clicking the corresponding link (Fig 6), identify the paragraph tagged with the inconsistent tag by searching “inconsistent” (Fig 7).



#9414 bnuxiaofang #162 about 13 hours ago

**Wikipedia article: 10th Garrison Division (People's Republic of China)**

**Inconsistence or contradictory tag**

In April 1956 the division was disbanded and transferred to the People's Liberation Army Navy and reorganized as 7th Institute of the Department of Defense, except its 3rd Battalion, 38th Garrison Regiment. {{Inconsistent(date=December 2018)}}

**Step1: Is this tag valid?**

☒ Valid<sup>[1]</sup> ☐ Invalid<sup>[2]</sup>

**Additional comment**

Reason from the edit history: disbanded then 3 more years of events?

Fig 6: Annotation – step 1

inconsistent'. A tooltip below the tag says: 'This statement is inconsistent with other parts of the article. (December 2018)'." data-bbox="146 760 903 807"/>

In April 1956 the division was disbanded and transferred to the [People's Liberation Army Navy](#) and reorganized as 7th Institute of the Department of Defense, except its 3rd Battalion, 38th Garrison Regiment. inconsistent

This statement is inconsistent with other parts of the article. (December 2018)

Fig 7: Read the Wikipedia article

2) Read the Wikipedia article to check whether the tag makes sense. In the above example, the Wikipedia editor who added this tag didn't specify the reason as an attribute of the tag. Although this is the recommended template, they simply didn't follow the rules, so we need to investigate further. We know that this tag was added in December 2018, so we can check

the editing history of this article to see under what condition this tag was added. In the revision history (see the figure below) we see that the editor put the reason in the edit comment “disbanded then 3 more years of events?” (last line in Fig 8). After checking this reason, if we agree that this inconsistent tag is valid, we go back to label studio and choose “valid” and put the reason in the additional comment box, as shown in Fig 1.

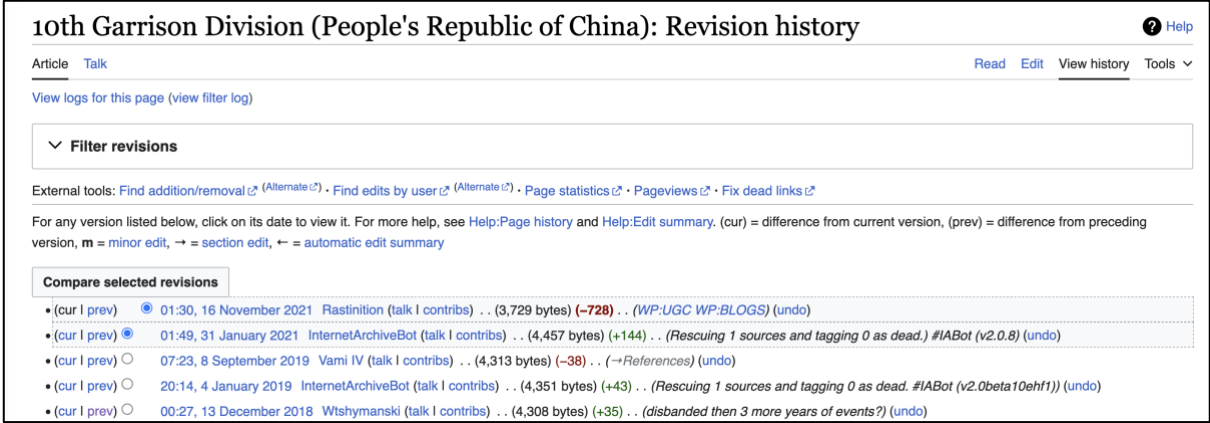

Fig 8: Checking the revision history of a Wikipedia article

Step2: find the inconsistent passages.

Copy the inconsistent sentences, paragraphs, or information (e.g., table or infobox rows) from the Wikipedia article(s) into the following boxes:

**Step 2: Copy the inconsistent sentences, paragraphs, or information (e.g., table or infobox rows) from the wikipedia article(s) into the following boxes**

**Article A title**

10th Garrison Division (People's Republic of China) [🔗](#) [📄](#)

**Article A relevant information (Passage 1)**

In April 1956 the division was disbanded and transferred to the People's Liberation Army Navy and reorganized as 7th Institute of the Department of Defense, except its 3rd Battalion, 38th Garrison Regiment. [🔗](#)

**Article A relevant information\_stand-alone (Passage 1)**

In April 1956 the 10th Garrison Division (People's Republic of China) was disbanded and transferred to the People's Liberation Army Navy and reorganized as 7th Institute of the Department of Defense, except its 3rd Battalion, 38th Garrison Regiment. [🔗](#)

**Article B title**

10th Garrison Division (People's Republic of China) [🔗](#) [📄](#)

**Article B relevant information (Passage 2)**

In March 1956 the division was reorganized as 3rd Garrison Division and was transferred to Guangzhou Military Region's control. Merely a month later, in April 1956 the division was further renamed as 3rd Machine-gun Artillery Division. The division then stationed in Zhongshan City, Guangdong. The machine-gun artillery division was also short-lived. In August 1956 the division was reduced and renamed as 10th Garrison Brigade. In May 1957 the brigade was inactivated and absorbed into Foshan Military Sub-district. In April 1959 the unit was re-activated from Foshan Military Sub-district as 10th Garrison Division. The division was then composed of: 37th Garrison Regiment; 38th Garrison Regiment; 39th Garrison Regiment; 1st Maritime Patrol Unit; 2nd Maritime Patrol Unit; 3rd Maritime Patrol Unit; 5th Maritime Patrol Unit. In December 1959, 39th Garrison Regiment and all four Maritime Patrol Units were transferred to Wanhui Fortress District's control. [🔗](#)

**Article B relevant information\_stand-alone (Passage 1)**

In March 1956 the 10th Garrison Division (People's Republic of China) was reorganized as 3rd Garrison Division and was transferred to Guangzhou Military Region's control. Merely a month later, in April 1956 the division was further renamed as 3rd Machine-gun Artillery Division. The division then stationed in Zhongshan City, Guangdong. The machine-gun artillery division was also short-lived. In August 1956 the division was reduced and renamed as 10th Garrison Brigade. In May 1957 the brigade was inactivated and absorbed into Foshan Military Sub-district. In April 1959 the unit was re-activated from Foshan Military Sub-district as 10th Garrison Division. The division was then composed of: 37th Garrison Regiment; 38th Garrison Regiment; 39th Garrison Regiment; 1st Maritime Patrol Unit; 2nd Maritime Patrol Unit; 3rd Maritime Patrol Unit; 5th Maritime Patrol Unit. In December 1959, 39th Garrison Regiment and all four Maritime Patrol Units were transferred to Wanhui Fortress District's control. [🔗](#)

Fig 9: Annotation – step 2

For this annotation task, often “Article A title” and “Article B title” are the same. Note that “Article A relevant information (Passage 1)” and “Article B relevant information (Passage 2)” contain the original passage information from the Wikipedia, which means that you should copy-paste the original information into these boxes without modifying them. When copying the original passages into these boxes, please remove the citation marks and the inconsistent tags (`{{inconsistent ...}}`). For “Article A relevant information\_stand-alone (Passage 1)” and “Article B relevant information\_stand-alone (Passage 2)”, you are required to slightly modify the original passages to make them stand-alone (decontextualization). Normally, this requires you to resolve the coreference anaphors or the bridging anaphors in the first sentence. In Wikipedia, oftentimes the antecedents for these anaphors are the article titles themselves.

### **Example of resolving coreference anaphors:**

In the example shown in Fig 9, we replace “the division” in the first sentence of both passages as “the 10th Garrison Division (People’s Republic of China)”

Below is another example of resolving coreference anaphors:

**Article A relevant information (Passage 1)**

His novel Grabinoulor appeared in 1919.

**Article A relevant information\_stand-alone (Passage 1)**

Pierre Albert-Birot's novel Grabinoulor appeared in 1919.

Fig 10: resolving coreference anaphors

### **Example of resolving bridging anaphors (one of my favorite topics ☺):**

In the following example as shown in Fig 11, we replace “The larvae” in the first sentence as “The larvae of Antherina”

**Article B title**

Antherina

**Article B relevant information (Passage 2)**

The larvae feed on oleander, privet, willows, beech, Liquidambar, Crataegus (hawthorns), grapevine, lilac, cherry, laurel, Forsythia, Rhus, Pistacia, apple, pear, plum and peach leaves, but foodplants differ from species to species.

**Article B relevant information\_stand-alone (Passage 1)**

The larvae of Antherina feed on oleander, privet, willows, beech, Liquidambar, Crataegus (hawthorns), grapevine, lilac, cherry, laurel, Forsythia, Rhus, Pistacia, apple, pear, plum and peach leaves, but foodplants differ from species to species.

Fig 11: resolving bridging anaphors

### **Step3: Annotate the contradiction reason.**

In this step, we use the template “passage 1 states that ..., however, passage 2 states that ...” to annotate the contradiction reason (see Fig 12). If possible, please copy-paste the exact contradicted spans (short phrases within a sentence) from both passages, such as “was disbanded” from passage 1 as shown in Fig 12. In this example, we leave the contradicted span from passage 2 empty since it involves a series of events across multiple sentences. Fig 13 shows an example in which we can easily identify the contradicted spans in both passages.



Step 3: Contradict reason

Passage 1 states that:

In April 1956 the division was disbanded

However, passage 2 states that:

The division had a series of activities from 1956 to 1959.

If possible, copy the contradicted span from passage 1:

was disbanded

If possible, copy the contradicted span from passage 2:

Add

Fig 12: Annotate the contradiction reason

Step 3: Contradict reason

Passage 1 states that:

The northbound span of 14th Street bridges was renamed the Arland D. Williams Jr. Memorial Bridge in 1983.

However, passage 2 states that:

The northbound span of 14th Street bridges was renamed the Arland D. Williams Jr. Memorial Bridge on March 13, 1985.

If possible, copy the contradicted span from passage 1:

1983

If possible, copy the contradicted span from passage 2:

March 13, 1985

Fig 13: Annotate the contradiction reason – another example

#### Step4: Annotate the contradiction types.

In this step, we assign the identified contradictory information to the appropriate types according to a pre-defined taxonomy. Back to our first example as shown in Fig 6/9/12, we assign it to the following contradiction types as shown in Fig 14

Step 4: Choose all options that can describe the above contradictory information

(DiscourseLevel)

Event/Relation-related

Text - Text

Within the same article

Implicit (reasoning required)

Fig 14: Annotate the contradiction types

Below we provide more details four the pre-defined four contradiction types.

**1) Contradiction type I:** As shown in Fig 15, contradiction type I focuses on the fine-grained semantics of the contradiction.



**Contradiction Type 1 – Phrase level – Non-entity NP:** The contradictory information is around two noun phrases that are not named entities in passage 1 and passage 2. In the following example as shown in Fig 17, the contradicted information are around two common nouns: monotypic (passage 1) and species to species (passage 2).

Step 3: Contradiction reason

Passage 1 states that:

Antherina is a monotypic. ## Additional Explanation: According to the world knowledge, a monotypic species is one that does not include subspecies.

However, passage 2 states that:

The foodplants for the larvae of Antherina differ from species to species.

If possible, copy the contradicted span from passage 1:

monotypic

If possible, copy the contradicted span from passage 2:

species to specie

Step 4: Choose all options that can describe the above contradictory information

(PhraseLevel) NP-related (non-entity) Text - Text Within the same article Implicit (reasoning required)

Click to add...

Fig 17: Contradiction type example

**Contradiction Type 1 – Phrase level – Event/relation:** The contradictory information is around two verb phrases that are describe two contradicted events or relations in passage 1 and passage 2. In the following example as shown in Fig 18, the contradicted information are around two verbs: “stimulates” (passage 1) and “inhibits” (passage 2).

Step 3: Contradiction reason

Passage 1 states that:

αVβ5 stimulates angiogenesis.

However, passage 2 states that:

αVβ5 inhibits angiogenesis.

If possible, copy the contradicted span from passage 1:

stimulates

If possible, copy the contradicted span from passage 2:

inhibits

Step 4: Choose all options that can describe the above contradictory information

(PhraseLevel) Event/Relation (e.g., verb) Text - Text Within the same article Explicit

Click to add...

Fig 18: Contradiction type example

**Contradiction Type 1 – Discourse level – NP-related:** The contradictory information is beyond the single sentence level from passage 1 and passage 2. The contradicted information from passage 1 can be anchored to a NP span, and the contradicted information from passage 2 is across multiple sentences. In the following example as shown in Fig 19, the contradicted information from passage 1 can be anchored to an NP: “five periods of time”, and the contradicted information from passage 2 contains a few paragraphs that contains three sub-section headers indicating three time periods.

Step 3: Contradiction reason

Passage 1 states that:

Aboriginal history in Western Australia has been grouped into five periods of time

However, passage 2 states that:

three time periods indicated by three sub-section headers

If possible, copy the contradicted span from passage 1:

five periods of time

If possible, copy the contradicted span from passage 2:

Add

Step 4: Choose all options that can describe the above contradictory information

(DiscourseLevel) NP-related

Text - Text

Within the same article

Implicit (reasoning required)

Click to add...

Fig 19: Contradiction type example

**Contradiction Type 1 – Discourse level – Event/relation-related:** The contradictory information is beyond the single sentence level from passage 1 and passage 2. The contradicted information from passage 1 can be anchored to a verb phrase, and the contradicted information from passage 2 is across multiple sentences. In the following example as shown in Fig 20, the contradicted information from passage 1 can be anchored to a VP: “was disbanded”, and the contradicted information from passage 2 contains a few paragraphs that describes a series of events.

Step 3: Contradiction reason

Passage 1 states that:

In April 1956 the division was disbanded

However, passage 2 states that:

The division had a series of activities from 1956 to 1959.

If possible, copy the contradicted span from passage 1:

was disbanded

If possible, copy the contradicted span from passage 2:

Add

Step 4: Choose all options that can describe the above contradictory information

(DiscourseLevel) Event/Relation-related

Text - Text

Within the same article

Implicit (reasoning required)

Click to add...

Fig 20: Contradiction type example

**2) Contradiction type II:** As shown in Fig 21, contradiction type II focuses on the modality the contradiction. It describes the modality of passage 1 and passage 2, whether the information is from a piece of text, or from a row an infobox or a table. Fig 22 shows an example of “contradict type II – infobox/table – Infobox/table”.

Contradict type II

4

☒ Text - Text

☐ Text - Infobox/table

☐ Infobox/table - Infobox/table

☐ Other

Fig 21: Contradiction type II

Step 3: Contradiction reason

Passage 1 states that:

Iwiti served the King in 19th dynasty. [↗](#) [✕](#)

However, passage 2 states that:

Iwiti served the King in c. 2500 BC. [↗](#) [✕](#)

If possible, copy the contradicted span from passage 1:

19th dynasty [↗](#) [✕](#)

If possible, copy the contradicted span from passage 2:

c. 2500 BC [↗](#) [✕](#)

Step 4: Choose all options that can describe the above contradictory information

(PhraseLevel) Entity - Date/time [✕](#) Infobox/table - Infobox/table [✕](#) Within the same article [✕](#) Explicit [✕](#)

Click to add... [▼](#)

Fig 22: Contradiction type example

**3) Contradiction type III:** As shown in Fig 23, contradiction type III focuses on the source the contradiction. It describes whether passage 1 and passage 2 are from the same article or not. For the inconsistent tags, most of contradictions are from the same article. In a few rare cases, the contradiction is from different articles. Fig 24 illustrates such an example: passage 1 is from the English version of the Wikipedia article “Pierre Albert-Birot” and passage 2 is from the French version of the article.

▼

Contradict type III

2

☒

Within the same article

☐

Across different articles

Fig 23: Contradiction type III

Step 3: Contradiction reason

Passage 1 states that:

Pierre Albert-Birot's novel Grabinoul appeared in 1919. [↗](#) [✕](#)

However, passage 2 states that:

Pierre Albert-Birot's novel Grabinoul appeared in 1918. [↗](#) [✕](#)

If possible, copy the contradicted span from passage 1:

1919 [↗](#) [✕](#)

If possible, copy the contradicted span from passage 2:

1918 [↗](#) [✕](#)

Step 4: Choose all options that can describe the above contradictory information

(PhraseLevel) Entity - Date/time [✕](#) Text - Text [✕](#) Across different articles [✕](#) Explicit [✕](#)

Click to add... [▼](#)

Fig 24: Contradiction type example

**4) Contradiction type IV:** As shown in Fig 25, contradiction type IV focuses on the reasoning aspect. It describes whether the contraction is explicit or implicit. Implicit contradiction requires us do to some reasoning to understand why passage 1 and passage 2 are contradicted. In the example shown in Fig 17, to understand that “monotypic (passage 1)” and “species to species (passage 2)” are contradicted, we need to carry out additional reasoning steps, i.e., first we need to know that according to commonsense knowledge, a

13

monotypic species is one that does not include subspecies; then “species to species” entails that there are more than one specie. Therefore, we can conclude that passage 1 is contradicted with passage 2.

✓

☐

Contradict type IV

2

✓

Explicit

☐

Implicit (reasoning required)

Fig 25: Contradiction type IV

**Note:** If the contradictory information exhibits other important attributes that are not covered by the existing taxonomy, using the additional comment box to describe it. Figure 26 shows such an example: passage 1 is from the English Wikipedia article, and passage 2 is from the French Wikipedia article, therefore in the additional comment for Step 4 we put “across different languages”

Step 3: Contradiction reason

Passage 1 states that:

Pierre Albert-Birot's novel Grabinoulor appeared in 1919.

However, passage 2 states that:

Pierre Albert-Birot's novel Grabinoulor appeared in 1918.

If possible, copy the contradicted span from passage 1:

1919

If possible, copy the contradicted span from passage 2:

1918

Step 4: Choose all options that can describe the above contradictory information

(PhraseLevel) Entity - Date/time Text - Text Across different articles Explicit

Click to add...

Additional comment

across different languages

Fig 26: Additional contradiction Type

Step5: Annotate the question and answers.

In this step, we formulate at least one question that highlights the contradictions between Passage 1 and Passage 2, eliciting different responses based on each passage. Fig 27 shows a question and answers example about the contradicted information in Fig 16.

Step 5: Write a question based on the above contradictory information that leads to different answers

Question

When was the northbound span of the 14th Street Bridge renamed the Arland D. Williams Jr. Memorial Bridge?

Answers

1983

March 13, 1985

Fig 27: write a question and different answers

### 3. Export annotations

After finishing the assigned annotation tasks, go back to the task pool panel, click “Export” and choose “JSON” as the format (Fig 28). Please rename the exported file using the following template: wikipediaContradict\_10\_<your name>.json

The screenshot displays the Label Studio interface for a project named 'WikipediaContradict'. The top panel shows a task pool with four tasks. The bottom panel shows the 'Export data' dialog with various export formats.

| Task ID  | Order | Not set | IF | Label All Tasks | Annotation                                                                 | paragraph_A                                         | title                                                                                                                                                                             | url                                                                        | paragraph_A_clean | tag                                            | tagDate       | tagRease                  |
|----------|-------|---------|----|-----------------|----------------------------------------------------------------------------|-----------------------------------------------------|-----------------------------------------------------------------------------------------------------------------------------------------------------------------------------------|----------------------------------------------------------------------------|-------------------|------------------------------------------------|---------------|---------------------------|
| 23:27:38 | 1     | 0       | 0  | 35%             | In April 1956 the division was disbanded and transferred to the People's   | 10th Garrison Division (People's Republic of China) | <a href="https://en.wikipedia.org/wiki/10th_Garrison_Division_(People's_Republic_of_China)">https://en.wikipedia.org/wiki/10th_Garrison_Division_(People's_Republic_of_China)</a> | In April 1956 the division was disbanded and transferred to the People's   | Inconsistent      | date=December 2018                             | December 2018 |                           |
| 23:36:25 | 1     | 0       | 0  | 35%             | * The northbound span was originally named the 14th Street Bridge when it  | 14th Street bridges                                 | <a href="https://en.wikipedia.org/wiki/14th_Street_bridges">https://en.wikipedia.org/wiki/14th_Street_bridges</a>                                                                 | * The northbound span was originally named the 14th Street Bridge when it  | Inconsistent      | date=June 2023                                 | June 2023     |                           |
| 23:40:52 | 1     | 0       | 0  | 35%             | Aboriginal people of Western Australia practised an oral tradition with no | Aboriginal history of Western Australia             | <a href="https://en.wikipedia.org/wiki/Aboriginal_history_of_Western_Australia">https://en.wikipedia.org/wiki/Aboriginal_history_of_Western_Australia</a>                         | Aboriginal people of Western Australia practised an oral tradition with no | Inconsistent      | reason=there are only three sub-sections below |               | there are on sections bel |
| 23:41:48 | 1     | 0       | 0  | 35%             | Code-switching, or the alternation of languages within a single            | African French                                      | <a href="https://en.wikipedia.org/wiki/African_French">https://en.wikipedia.org/wiki/African_French</a>                                                                           | Code-switching, or the alternation of languages within a single            | Inconsistent      | date=May 2012                                  | May 2012      |                           |

**Export data**

You can export dataset in one of the following formats:

- ☒ **JSON**  
List of items in raw JSON format stored in one JSON file. Use to export both the data and the annotations for a dataset. It's Label Studio Common Format.
- ☐ **JSON-MIN**  
List of items where only "from\_name", "to\_name" values from the raw JSON format are exported. Use to export only the annotations for a dataset.
- ☐ **CSV**  
Results are stored as comma-separated values with the column names specified by the values of the "from\_name" and "to\_name" fields.
- ☐ **TSV**  
Results are stored in tab-separated tabular file with column names specified by "from\_name" "to\_name" values
- ☐ **CONLL2003** sequence labeling text tagging named entity recognition  
Popular format used for the CONLL-2003 named entity recognition challenge.
- ☐ **COCO** image segmentation object detection  
Popular machine learning format used by the COCO dataset for object detection and image segmentation tasks with polygons and rectangles.
- ☐ **Pascal VOC XML** image segmentation object detection  
Popular XML format used for object detection and polygon image segmentation tasks.
- ☐ **YOLO** image segmentation object detection  
Popular TXT format is created for each image file. Each txt file contains annotations for the corresponding image file, that is object class, object coordinates, height & width.
- ☐ **Brush labels to NumPy** image segmentation  
A Python NumPy array of labels for each pixel. The labels are stored in a single file.

**Export**

Fig 28: Export annotations
