# Supplementary material
Source: ML conference proceedings conference paper supplement (https://openreview.net/forum?id=5t7DtLwTVC)
Supplement: supplementary_material [file InconsistentArticleAnalysis.xlsx]

## Sheet: InconsistentArticles
Article	ArticleLink	UserTaggedInconsistentSent	Contradict paragraph	Verify	UserComment	Yufang's Comment	Question	Answer
Tom Heap	https://en.wikipedia.org/wiki/Tom_Heap	Tom Heap (born 3 January 1966 in Hertford, Hertfordshire)[2][inconsistent] is an English television and radio reporter and presenter best known for his contributions to the BBC One programme Countryfile, the same channel's Panorama programme, and the BBC Radio 4 programme Costing the Earth. He was previously Rural Affairs Correspondent of BBC News.		invalid	Inconsistent|date=March 2019, no reason history page: 08:14, 11 March 2019‎ Helper201 talk contribs‎ 6,219 bytes +32‎ Added a tag. The date of birth claim in the introduction is inconstant with the date of birth claim in the infobox. Obviously at least one of these dates is wrong, but since neither are cited, it is unclear which is incorrect, or if both of them are.	the text was: Tom Heap (born 6 January 1966 in Hertford, Hertfordshire) on March 2019, but later at 17:34, 11 April 2021‎ 212.129.77.117, another user fix this problem changed the birthdate to 3 January, but the user didn't remove the inconsistent label	When was Tom Heap was born?
14th Street bridges	https://en.wikipedia.org/wiki/14th_Street_bridges	The northbound span was originally named the 14th Street Bridge when it opened in 1950, renamed the Rochambeau Bridge eight years later, and renamed the Arland D. Williams Jr. Memorial Bridge in 1983[inconsistent] for a passenger of Air Florida Flight 90 who died saving others from the freezing water.[4]		valid	Inconsistent|date=June 2023, no reason		When was the northbound span of the 14th Street Bridge renamed the Arland D. Williams Jr. Memorial Bridge?	[1983, March 13, 1985]
Little Buddha	https://en.wikipedia.org/wiki/Little_Buddha	The film was very successful in France, where it was the 19th highest-grossing film of the year, with 1,359,483 admissions.[11] In its opening week in France, it sold 308,660 tickets for a gross of $1.52 million.[12][13] The film, against competition from such films as The Flintstones and Maverick, opened at number nine at the US box office.[14] It dropped out of the top ten the next week, closin…	inforbox: Budget $35 million[citation needed][inconsistent]	valid	{Inconsistent|date=January 2022}, no reason	currently, inforbox is not captured	What's the budget of the film "Little Buddha"?	[$30 million, $35 million]
Loretto Chapel	https://en.wikipedia.org/wiki/Loretto_Chapel	The staircase lacks the newel or central pole usually used to support and stabilize a spiral staircase, and therefore the means of supporting the weight is not obvious. However, the staircase is supported by its stringers just like a conventional (straight) staircase, although in this case each stringer is twisted into a helix.[11] Observers have also noted that the inside stringer has such a tig…	The staircase is built mostly out of wood and is held together by wooden pegs, with no glue, nails or other hardware used. The inner stringer consists of seven wooden segments joined together with pegs, while the longer outer stringer has nine segments.	valid	Inconsistent|date=December 2023|reason=A prior section states neither nails or glue were used in the construction	is any glue used to build the Loretto Chapel stairecase?		[yes, no]
Lake Maracaibo	https://en.wikipedia.org/wiki/Lake_Maracaibo	Lake Maracaibo is deep in the south and shallow in the north. The northern half of the lake, which looks like a bottleneck, is 55 kilometers long.[1][8] The southeastern edge of the lake basin with a flat bottom is steep and the northwestern edge is gentle.[2] It is slightly salty due to the influence of tides, and the overall salinity is between 1.5 and 3.8%.[inconsistent][1][7][failed verificat…		valid	{Inconsistent|date=December 2023|reason=Further in this paragraph the salinity is given as 10 times lower.		what's the salinity of Lake Maracaibo?
Liu Zhi (ROC)	https://en.wikipedia.org/wiki/Liu_Zhi_(ROC)	Liu first fled to British Hong Kong, and later on made a living in Indonesia as a Chinese language teacher. In 1953, he was ordered to return to Kuomingtang-controlled Taiwan as a political adviser to Chiang Kai-shek. He was decorated with the Order of Blue Sky and White Sun. He died in Taiwan in 1972.[inconsistent]	infobox: Died 15 January 1971 (aged 78)	valid	{{Inconsistent|date=April 2020|reason=contradicted in infobox}}		when was Liu Zhi (ROC) died?	[15 January 1971, 1972]
LSU Tigers footbal	https://en.wikipedia.org/wiki/LSU_Tigers_football#Conference_affiliations	LSU has been independent and affiliated with three conferences.[96]: 181–196 [inconsistent]	inforbox after carefully checking: SIAA (1893–1922)		{Inconsistent} no date, no reason		When did LSU Tiger Football team join Southern Intercollegiate Athletic Association (SIAA)?	[1893, 1896]
Cadet grey	https://en.wikipedia.org/wiki/Cadet_grey	Cadet grey (sometimes spelled cadet gray in parts of the United States) is a somewhat blue-greyish shade of the color grey. The first recorded use of cadet grey as a color name in English was in 1912.[1][inconsistent] Before 1912, the word cadet grey was used as a name for a type of military issue uniform.	Cadet grey had previously been named the color chosen for the army of the Republic of Texas in 1835 and 1840.[6][7]	valid?	history page: 17:46, 13 April 2014‎ 62.78.237.27 talk‎ 5,676 bytes +17‎ This sentence is flatly contradicted by the Robinson ref below, using cadet grey as a color name in 1835. undo		when was cadet grey used as a color name? when was the first recorded use of cadet grey as a color name in English
European ratsnake	https://en.wikipedia.org/wiki/European_ratsnake	The European ratsnake or leopard snake (Zamenis situla), is a species of nonvenomous colubrid snake endemic to Europe, Asia Minor, and the Caucasus.[inconsistent][citation needed]		invalid	reason=No other sources mention a Caucasian locality
Mike Johnson (Louisiana politician)	https://en.wikipedia.org/wiki/Mike_Johnson_(Louisiana_politician)	The Johnsons have five children, including an adopted son they took in when he was 14 shortly after they married.[175][176][contradictory]		invalid?	{{Contradictory inline|reason=According to Johnson\'s timeline, he and his "newlywed wife" started taking care of the boy in 1997, two years before their 1999 marriage.|date=October 2023}}'	the annotator meant that this statement was contradict to a reference, which is not in the current newest verstion anymore: '{{Contradictory inline|reason=According to Johnson\'s timeline, he and his "newlywed wife" started taking care of the boy in 1997, two years before their 1999 marriage.|date=October 2023}}'

## Sheet: prombing example
		type
Charles D'Oyly	D'Oyly went to England with the family in 1785 and received his first formal education there. In 1798 he returned to India as Assistant to the Registrar in the Court of Appeal in Calcutta. In 1803 he was appointed Keeper of the Records in the Governor General's office, and in 1805, he married his cousin, Marian Greer, daughter of William Greer. D'Oyly sketched incessantly and took an active inter…	inference required

## Sheet: Sheet3
taxonomy design
question	independent	factural/controvercial - dependent
	dependent [location, time]
evidence	contradict tokens
	contradict reasons
	contradict types
